# Supplementary material for: Benefit of dual-chamber pacing with Closed Loop Stimulation in tilt-induced cardio-inhibitory reflex syncope (BIOSync trial): study protocol for a randomized controlled trial
Source: Springer Nature journal article supplement (doi:10.1186/s13063-017-1941-4), 2017-05-04

**Study Title / EAC Code: BIOSync CLS / BA103**

| PI               | Site                                    | Country | City           | Competent Authority                                             | Approval status               | Ethics Committee                                                    | Approval status               |
|------------------|-----------------------------------------|---------|----------------|-----------------------------------------------------------------|-------------------------------|---------------------------------------------------------------------|-------------------------------|
| Dr. P. Palmisano | Ospedale G. Panico                      | IT      | Tricase (LE)   | Ministero della Salute Italiano – Ufficio VI Dispositivi Medici | Obtained                      | Comitato Etico dell'ASL di Lecce                                    | Obtained                      |
| Dr. G. Bertero   | Ospedale San Martino                    | IT      | Genova         | Ministero della Salute Italiano – Ufficio VI Dispositivi Medici | Obtained                      | Comitato Etico Regione Liguria                                      | Obtained                      |
| Dr. M. Tomaino   | Ospedale di Bolzano                     | IT      | Bolzano        | Ministero della Salute Italiano – Ufficio VI Dispositivi Medici | Obtained                      | Comitato Etico Provinciale                                          | Obtained                      |
| Prof. S. Favale  | Policlinico di Bari                     | IT      | Bari           | Ministero della Salute Italiano – Ufficio VI Dispositivi Medici | Obtained                      | Comitato Etico Indipendente                                         | Obtained                      |
| Dr. M. Lunati    | Azienda Ospedaliera Niguarda Ca' Granda | IT      | Milano         | Ministero della Salute Italiano – Ufficio VI Dispositivi Medici | Obtained                      | Comitato Etico Milano Area C                                        | Obtained                      |
| Dr. A. Ungar     | Ospedale di Careggi                     | IT      | Firenze        | Ministero della Salute Italiano – Ufficio VI Dispositivi Medici | Application under preparation | Comitato Etico di Area Vasta Centro                                 | Application under preparation |
| Dr. F. Quartieri | Arcispedale Santa Maria Nuova           | IT      | Reggio Emilia  | Ministero della Salute Italiano – Ufficio VI Dispositivi Medici | Obtained                      | Comitato Etico Provinciale di Reggio Emilia                         | Obtained                      |
| Dr. G. Varalda   | Ospedale Universitario S. Luigi         | IT      | Orbassano (TO) | Ministero della Salute Italiano – Ufficio VI Dispositivi Medici | Obtained                      | Comitato Etico Interaziendale A.O.U. San Luigi Gonzaga Di Orbassano | Obtained                      |

|                      |                                               |    |                 |                                                                 |                               |                                                              |                              |
|----------------------|-----------------------------------------------|----|-----------------|-----------------------------------------------------------------|-------------------------------|--------------------------------------------------------------|------------------------------|
| Dr. G. Zingarini     | Ospedale Santa Maria della Misericordia       | IT | Perugia         | Ministero della Salute Italiano – Ufficio VI Dispositivi Medici | Not Approved                  | CEAS Umbria                                                  | Not Approved                 |
| Dr. G. Maglia        | Azienda Ospedaliera Pugliese Ciaccio          | IT | Catanzaro       | Ministero della Salute Italiano – Ufficio VI Dispositivi Medici | Obtained                      | Comitato Etico dell’A.O. “Pugliese Ciaccio”                  | Obtained                     |
| Prof. A. Rapacciuolo | Azienda Ospedaliera Universitaria Federico II | IT | Napoli          | Ministero della Salute Italiano – Ufficio VI Dispositivi Medici | Obtained                      | Comitato Etico “Università Federico II”                      | Obtained                     |
| Prof. G. Nigro       | Azienda Ospedaliera dei Colli – Monaldi       | IT | Napoli          | Ministero della Salute Italiano – Ufficio VI Dispositivi Medici | Application under evaluation  | Comitato Etico Seconda Università degli Studi di Napoli      | Obtained                     |
| Dr. E. De Ruvo       | Policlinico Casilino                          | IT | Roma            | Ministero della Salute Italiano – Ufficio VI Dispositivi Medici | Application under preparation | Spett.le Comitato Etico Lazio 2                              | Application under evaluation |
| Dr. M. Zardini       | Azienda Ospedaliero-Universitaria di Parma    | IT | Parma           | Ministero della Salute Italiano – Ufficio VI Dispositivi Medici | Application under preparation | Comitato Etico Azienda Ospedaliero-Universitaria di Parma    | Application under evaluation |
| Prof. J.C.Deharo     | Centre Hospitalier Universitaire de La Timone | FR | Marseille       | ANSM                                                            | Obtained                      | CPP                                                          | Obtained                     |
| Dr. S. Boveda        | Clinique Pasteur                              | FR | Toulouse        | ANSM                                                            | Obtained                      | CPP                                                          | Obtained                     |
| Dr. J. Taieb         | CH Aix-en-Provence                            | FR | Aix-en-Provence | ANSM                                                            | Obtained                      | CPP                                                          | Obtained                     |
| Dr. A. Moya          | Hospital Universitario Vall d'Hebròn          | ES | Barcelona       | AEMPS                                                           | Obtained                      | Comité Etico de Investigación Clínica Hospital Vall d'Hebrón | Obtained                     |
| Dr. I. Anguera       | Hospital De Bellvitge                         | ES | Barcelona       | AEMPS                                                           | Obtained                      | CEIC Bellvitge                                               | Obtained                     |

|                      |                                                       |    |                  |               |          |                                                          |                              |
|----------------------|-------------------------------------------------------|----|------------------|---------------|----------|----------------------------------------------------------|------------------------------|
| Dr. J. Hernández     | Hospital Universitario Nuestra Senora de Candelaria   | ES | Santa Cruz       | AEMPS         | Obtained | CEIC del Hospital Universitario Ntra. Sra. de Candelaria | Obtained                     |
| Dr. Pedrote          | Hospital Virgen del Rocío                             | ES | Sevilla          | AEMPS         | Obtained | CEIC Hospital Virgen del Rocío                           | Obtained                     |
| Dr. F. Ayala-Paredes | CHUS - Centre hospitalier universitaire de Sherbrooke | CA | Sherbrooke       | Health Canada | Obtained | CHUS Ethics Committee                                    | Obtained                     |
| Dr. M. Oliveira      | Hospital de Santa Marta                               | P  | Lisboa           | INFARMED      | Obtained | CEIC                                                     | Application under evaluation |
| Dr. K. Reis          | Hospital da Luz                                       | P  | Lisboa           | INFARMED      | Obtained | CEIC                                                     | Application under evaluation |
| Dr. F. J. de Lange   | AMC Academic Medical Center                           | NL | Amsterdam        | IGZ           | Obtained | METC Atrium-Orbis-Zuyd                                   | Obtained                     |
| Dr. A. Aerts         | Atrium MC                                             | NL | Heerlen          | IGZ           | Obtained | METC Atrium-Orbis-Zuyd                                   | Obtained                     |
| Dr. M Hemels         | Rijnstate Ziekenhuis                                  | NL | Rijnstate-Arnhem | IGZ           | Obtained | METC Atrium-Orbis-Zuyd                                   | Obtained                     |

**Confirmed by:** Alessio Gargaro  
Project Manager

**Date:** 11-NOV-2016

**Signature:** 

Supplement: MOESM1 [file 12265688]
